# Supplementary material for: Highly phosphorescent iridium(iii) complexes based on 2-(biphenyl-4-yl)benzo[d]oxazole derivatives: synthesis, structures, properties and DFT calculations
Source: Royal Society of Chemistry journal article supplement (doi:10.1039/c5nj00975h), 2015-01-01
Supplement: c5nj00975h1.pdf [file c5nj00975h1.pdf]

## **Highly phosphorescent iridium(III) complexes based on 2-(biphenyl-4-yl)benzo[d]oxazole derivatives: Synthesis, structures, properties and DFT calculations**

Zhi-Gang Niu,<sup>a,†</sup> Tao Zheng,<sup>a,‡</sup> You-Hui Su,<sup>a</sup> Peng-Jiang Wang,<sup>a</sup> Xiao-Yan Li,<sup>a</sup> Feng Cui,<sup>a</sup> Jiao Liang,<sup>a</sup> Gao-Nan Li<sup>\*ab</sup>

<sup>a</sup> *College of Chemistry and Chemical Engineering, Hainan Normal University, Haikou 571158, PR China.*

*E-mail: ligaonan2008@163.com;*

*Fax: +86-898-6588942; Tel: +86-898-31381637.*

<sup>b</sup> *State Key Laboratory of Coordination Chemistry, School of Chemistry and Chemical Engineering, Nanjing University, Nanjing 210093, PR China*

## **Supplementary Information**

**Table S1** Selected bond distances (Å) and angles (°) for complexes **3a–3d****3a**

|                   |            |                  |           |
|-------------------|------------|------------------|-----------|
| Ir(1)-O(3)        | 2.127(3)   | N(1)-C(13)       | 1.300(6)  |
| Ir(1)-O(4)        | 2.123(4)   | N(2)-C(32)       | 1.297(6)  |
| Ir(1)-N(1)        | 2.025(3)   | O(1)-C(13)       | 1.360(5)  |
| Ir(1)-N(2)        | 2.042(3)   | O(2)-C(32)       | 1.348(5)  |
| Ir(1)-C(11)       | 2.002(4)   | C(7)-C(6)        | 1.490(6)  |
| Ir(1)-C(30)       | 2.006(5)   | C(26)-C(25)      | 1.482(6)  |
| N(1)-Ir(1)-N(2)   | 174.26(16) | O(4)-Ir(1)-O(3)  | 88.73(15) |
| C(11)-Ir(1)-O(4)  | 176.86(15) | N(1)-Ir(1)-O(3)  | 87.23(13) |
| C(30)-Ir(1)-O(3)  | 176.78(14) | N(1)-Ir(1)-C(11) | 80.55(16) |
| C(11)-Ir(1)-C(30) | 89.30(17)  | C(11)-Ir(1)-O(3) | 90.61(16) |

**3b**

|                   |            |                  |           |
|-------------------|------------|------------------|-----------|
| Ir(1)-O(3)        | 2.135(3)   | N(1)-C(7)        | 1.318(6)  |
| Ir(1)-O(4)        | 2.147(4)   | N(2)-C(26)       | 1.320(7)  |
| Ir(1)-N(1)        | 2.028(4)   | O(1)-C(7)        | 1.363(6)  |
| Ir(1)-N(2)        | 2.042(4)   | O(2)-C(26)       | 1.343(6)  |
| Ir(1)-C(13)       | 2.008(5)   | F(1)-C(17)       | 1.361(8)  |
| Ir(1)-C(32)       | 2.007(5)   | F(2)-C(36)       | 1.328(10) |
| N(1)-Ir(1)-N(2)   | 175.48(15) | O(4)-Ir(1)-O(3)  | 88.98(15) |
| C(13)-Ir(1)-O(4)  | 172.99(18) | N(1)-Ir(1)-O(3)  | 89.24(14) |
| C(32)-Ir(1)-O(3)  | 175.57(17) | N(1)-Ir(1)-C(13) | 80.58(19) |
| C(13)-Ir(1)-C(32) | 94.7(2)    | C(13)-Ir(1)-O(3) | 85.88(17) |

**3c**

|             |          |             |          |
|-------------|----------|-------------|----------|
| Ir(1)-O(3)  | 2.136(2) | N(1)-C(7)   | 1.310(4) |
| Ir(1)-O(4)  | 2.141(2) | N(2)-C(27)  | 1.303(4) |
| Ir(1)-N(1)  | 2.035(3) | O(1)-C(7)   | 1.357(4) |
| Ir(1)-N(2)  | 2.036(3) | O(2)-C(27)  | 1.362(4) |
| Ir(1)-C(13) | 2.017(3) | C(17)-C(20) | 1.509(6) |

|                    |            |                  |           |
|--------------------|------------|------------------|-----------|
| Ir(1)-C(29)        | 2.013(3)   | C(45)-C(43)      | 1.505(6)  |
| N(1)-Ir(1)-N(2)    | 173.92(11) | O(4)-Ir(1)-O(3)  | 88.29(9)  |
| C(13)-Ir(1)-O(4)   | 176.36(11) | N(1)-Ir(1)-O(3)  | 87.71(10) |
| C(29)-Ir(1)-O(3)   | 175.61(10) | N(1)-Ir(1)-C(13) | 80.40(12) |
| C(13)-Ir(1)-C(29)  | 93.44(12)  | C(13)-Ir(1)-O(3) | 89.40(11) |
| <b>3d</b>          |            |                  |           |
| Ir(1)-O(2)         | 2.123(4)   | N(1)-C(7)        | 1.309(7)  |
| Ir(1)-N(1)         | 2.028(4)   | O(1)-C(7)        | 1.353(6)  |
| Ir(1)-C(13)        | 2.005(5)   | C(16)-F(1)       | 1.342(8)  |
| C(14)-C(11)        | 1.514(7)   | C(18)-F(2)       | 1.365(7)  |
| N(1)-Ir(1)-N(1i)   | 172.1(3)   | O(2)-Ir(1)-O(2i) | 89.2(2)   |
| C(13)-Ir(1)-O(2i)  | 176.37(17) | N(1)-Ir(1)-O(2)  | 88.95(15) |
| C(13)-Ir(1)-C(13i) | 89.7(3)    | N(1)-Ir(1)-C(13) | 79.69(19) |

**Table S2** Main experimental and calculated optical transitions for complexes **3a–3e**

| Complex          | Orbital Excitations              | Character                        | Oscillation Strength | Calcd (nm) | Exptl (nm) |
|------------------|----------------------------------|----------------------------------|----------------------|------------|------------|
| <b>3a</b>        | HOMO → LUMO                      | MLCT ( $\pi \rightarrow \pi^*$ ) | 0.1231               | 438        | 430        |
|                  | HOMO-1 → LUMO+1                  | MLCT ( $\pi \rightarrow \pi^*$ ) | 0.0602               | 396        | 378        |
|                  | HOMO-3 → LUMO                    | ILCT ( $\pi \rightarrow \pi^*$ ) | 0.1941               | 356        | 349        |
|                  | HOMO-2 → LUMO                    |                                  | 0.2271               | 345        |            |
|                  | HOMO-2 → LUMO+1                  |                                  | 0.459                | 340        |            |
|                  | HOMO-4 → LUMO                    | ILCT ( $\pi \rightarrow \pi^*$ ) | 0.4628               | 319        | 313        |
|                  | HOMO-4 → LUMO+1                  |                                  | 0.1271               | 316        |            |
|                  | HOMO → LUMO+4                    | ILCT ( $\pi \rightarrow \pi^*$ ) | 0.0799               | 277        | 270        |
|                  | HOMO → LUMO+5                    |                                  |                      |            |            |
| HOMO-2 → LUMO+10 | ILCT ( $\pi \rightarrow \pi^*$ ) | 0.0501                           | 225                  | 227        |            |
| <b>3b</b>        | HOMO → LUMO                      | MLCT ( $\pi \rightarrow \pi^*$ ) | 0.1246               | 438        | 438        |

|           |                  |                                  |        |     |     |
|-----------|------------------|----------------------------------|--------|-----|-----|
|           | HOMO-1 → LUMO+1  | MLCT ( $\pi \rightarrow \pi^*$ ) | 0.0621 | 396 | 390 |
|           | HOMO-3 → LUMO    | ILCT ( $\pi \rightarrow \pi^*$ ) | 0.2094 | 357 | 353 |
|           | HOMO-2 → LUMO    |                                  | 0.2548 | 346 |     |
|           | HOMO → LUMO+2    |                                  | 0.2092 | 341 |     |
|           | HOMO → LUMO+2    |                                  | 0.2783 | 340 |     |
|           | HOMO-2 → LUMO+1  |                                  |        |     |     |
|           | HOMO-4 → LUMO    | ILCT ( $\pi \rightarrow \pi^*$ ) | 0.4596 | 321 | 312 |
|           | HOMO-4 → LUMO+1  |                                  | 0.1395 | 318 |     |
|           | HOMO-5 → LUMO+1  |                                  | 0.2049 | 301 |     |
|           | HOMO-8 → LUMO    | ILCT ( $\pi \rightarrow \pi^*$ ) | 0.0661 | 270 | 270 |
|           | HOMO-9 → LUMO    |                                  |        |     |     |
|           | HOMO-4 → LUMO+7  | ILCT ( $\pi \rightarrow \pi^*$ ) | 0.0469 | 223 | 225 |
|           | HOMO-17 → LUMO   |                                  |        |     |     |
| <b>3c</b> | HOMO → LUMO      | MLCT ( $\pi \rightarrow \pi^*$ ) | 0.1287 | 438 | 438 |
|           | HOMO-1 → LUMO+1  | MLCT ( $\pi \rightarrow \pi^*$ ) | 0.0782 | 396 | 390 |
|           | HOMO-2 → LUMO    | ILCT ( $\pi \rightarrow \pi^*$ ) | 0.288  | 358 | 357 |
|           | HOMO-3 → LUMO    |                                  | 0.2645 | 349 |     |
|           | HOMO-3 → LUMO+1  |                                  | 0.4648 | 343 |     |
|           | HOMO-4 → LUMO    |                                  | 0.4498 | 325 |     |
|           | HOMO-4 → LUMO+1  | ILCT ( $\pi \rightarrow \pi^*$ ) | 0.1213 | 321 | 316 |
|           | HOMO-5 → LUMO+1  |                                  | 0.1814 | 301 |     |
|           | HOMO-7 → LUMO    | ILCT ( $\pi \rightarrow \pi^*$ ) | 0.152  | 272 | 271 |
|           | HOMO-10 → LUMO   |                                  |        |     |     |
|           | HOMO-16 → LUMO+1 | ILCT ( $\pi \rightarrow \pi^*$ ) | 0.0649 | 226 | 227 |
| <b>3d</b> | HOMO → LUMO      | MLCT ( $\pi \rightarrow \pi^*$ ) | 0.1192 | 442 | 440 |
|           | HOMO-1 → LUMO+1  | MLCT ( $\pi \rightarrow \pi^*$ ) | 0.0409 | 401 | 389 |
|           | HOMO-3 → LUMO    | ILCT ( $\pi \rightarrow \pi^*$ ) | 0.1525 | 359 | 355 |

---

---

|           |                  |                                  |        |     |     |
|-----------|------------------|----------------------------------|--------|-----|-----|
|           | HOMO-2 → LUMO    |                                  | 0.2386 | 346 |     |
|           | HOMO-2 → LUMO+1  |                                  | 0.4438 | 341 |     |
|           | HOMO-4 → LUMO    | ILCT ( $\pi \rightarrow \pi^*$ ) | 0.4481 | 314 | 309 |
|           | HOMO-4 → LUMO+1  |                                  | 0.1902 | 311 |     |
|           | HOMO-5 → LUMO+1  |                                  | 0.2899 | 304 |     |
|           | HOMO → LUMO+5    | ILCT ( $\pi \rightarrow \pi^*$ ) | 0.2278 | 279 | 271 |
|           | HOMO → LUMO+9    |                                  |        |     |     |
|           | HOMO-5 → LUMO+3  | ILCT ( $\pi \rightarrow \pi^*$ ) | 0.0407 | 226 | 225 |
|           | HOMO-2 → LUMO+10 |                                  |        |     |     |
| <b>3e</b> | HOMO → LUMO      | MLCT ( $\pi \rightarrow \pi^*$ ) | 0.1171 | 440 | 438 |
|           | HOMO-1 → LUMO+1  | MLCT ( $\pi \rightarrow \pi^*$ ) | 0.0457 | 396 | 388 |
|           | HOMO-2 → LUMO    | ILCT ( $\pi \rightarrow \pi^*$ ) | 0.1975 | 358 | 355 |
|           | HOMO-3 → LUMO    |                                  | 0.2224 | 344 |     |
|           | HOMO-3 → LUMO+1  |                                  | 0.471  | 338 |     |
|           | HOMO-4 → LUMO    |                                  | 0.4249 | 317 |     |
|           | HOMO-4 → LUMO+1  | ILCT ( $\pi \rightarrow \pi^*$ ) | 0.148  | 313 | 309 |
|           | HOMO-5 → LUMO+1  |                                  | 0.212  | 302 |     |
|           | HOMO → LUMO+9    | ILCT ( $\pi \rightarrow \pi^*$ ) | 0.1376 | 279 | 271 |
|           | HOMO → LUMO+7    |                                  |        |     |     |
|           | HOMO-3 → LUMO+10 | ILCT ( $\pi \rightarrow \pi^*$ ) | 0.0576 | 225 | 226 |
|           | HOMO-17 → LUMO   |                                  |        |     |     |

---

**Table S3** Frontier orbital energy and electron density distribution for complexes **3a–3e**

| Complex   | Orbital | Energy (eV) | Composition (%) |             |            |      |
|-----------|---------|-------------|-----------------|-------------|------------|------|
|           |         |             | Ir              | benzoxazole | Biphenyl-R | acac |
| <b>3a</b> | LUMO    | -1.800      | 8.28            | 42.58       | 48.07      | 1.07 |
|           | HOMO    | -5.330      | 50.56           | 10.25       | 34.11      | 5.08 |
| <b>3b</b> | LUMO    | -1.817      | 2.30            | 51.31       | 45.31      | 1.08 |
|           | HOMO    | -5.353      | 49.58           | 12.92       | 32.40      | 5.09 |
| <b>3c</b> | LUMO    | -1.777      | 2.29            | 48.85       | 49.00      | 1.08 |
|           | HOMO    | -5.307      | 49.09           | 11.20       | 35.46      | 4.97 |
| <b>3d</b> | LUMO    | -1.928      | 2.02            | 44.63       | 52.49      | 0.87 |
|           | HOMO    | -5.421      | 50.72           | 10.66       | 33.25      | 5.37 |
| <b>3e</b> | LUMO    | -1.831      | 2.11            | 47.69       | 49.19      | 1.01 |
|           | HOMO    | -5.354      | 50.90           | 10.43       | 33.38      | 5.29 |

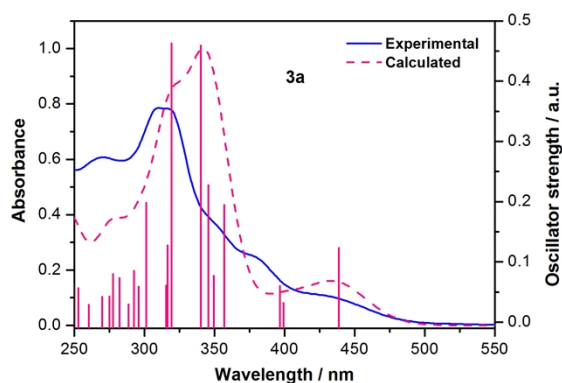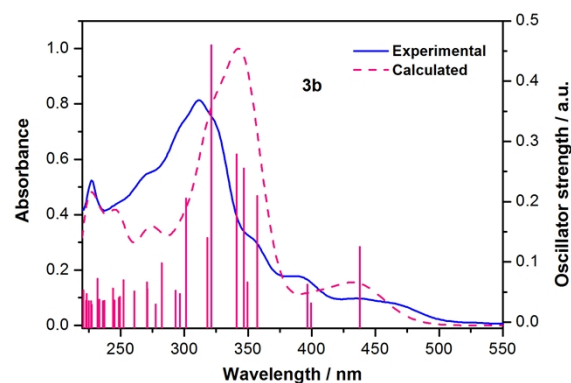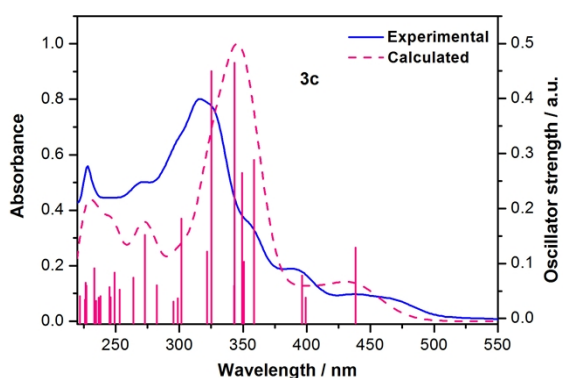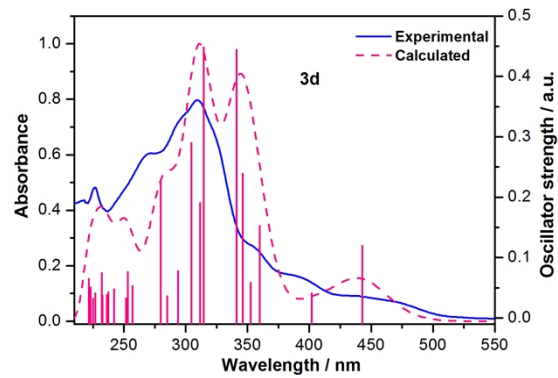

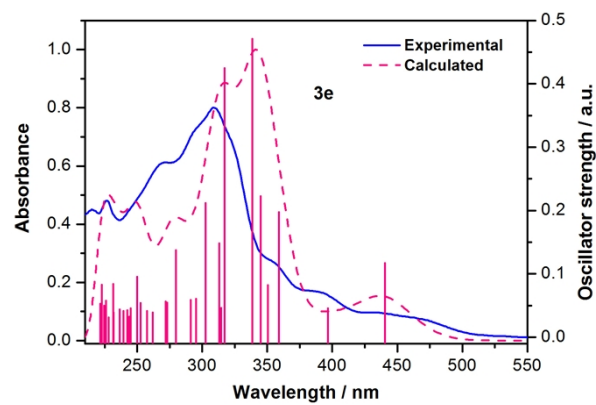

**Fig. S1** Experimental (blue lines) and calculated (pink lines) absorption spectra for **3a–3e**. The pink vertical bars represent the mean contributions of the absorption spectra.
